# Supplementary material for: Clinicopathological correlates in the frontotemporal lobar degeneration–motor neuron disease spectrum
Source: PubMed Central journal article supplement — Brain. 2024 Jan 16;147(7):2357–67. doi: 10.1093/brain/awae011 (PMC11224598; doi:10.1093/brain/awae011), 2024-01-16
Supplement: awae011_supplementary_data.pdf [file awae011_supplementary_data.pdf]

**Supplementary Table 1 Antibodies used for immunohistochemistry and their pretreatments.**

| <b>Antibody</b>       | <b>Cone</b>      | <b>Company</b>                                          | <b>Host</b> | <b>Pretreatment</b>        | <b>Incubation time (min)</b> | <b>Dilution</b> |
|-----------------------|------------------|---------------------------------------------------------|-------------|----------------------------|------------------------------|-----------------|
| Beta-Amyloid          | 6F/3D            | DAKO, Glostrup, Denmark                                 | Mouse       | EDTA pH 9 + formic acid    | 45                           | 1/50            |
| Anti p-tau            | AT8              | Thermo Scientific, Rockford, USA                        | Mouse       | EDTA pH 9                  | 45                           | 1/1000          |
| Tau RD3               | 8E6/C11          | Millipore, Temecula, CA, USA                            | Mouse       | Citrate pH 6 + formic acid | 60                           | 1/5000          |
| Tau RD4               | 1E1/A6           | Millipore, Temecula, CA, USA                            | Mouse       | Citrate pH 6 + formic acid | 40                           | 1/50            |
| $\alpha$ -synuclein   | KM51             | Novocastra, Newcastle, UK                               | Mouse       | EDTA pH 9 + formic acid    | 30                           | 1/200           |
| Ubiquitin             | Polyclonal       | DAKO, Glostrup, Denmark                                 | Rabbit      | Citrate pH 6               | 30                           | 1/4000          |
| Anti p62              | 3/P62 LCK ligand | BD Biosciences, San Jose, USA                           | Mouse       | EDTA pH 9                  | 30                           | 1/500           |
| $\alpha$ - internexin | 2E3              | Novex, Invitrogen, Thermo Scientific, Rockford, IL, USA | Mouse       | EDTA pH 9                  | 30                           | 1/800           |
| FUS                   | Polyclonal       | Sigma Aldrich, St Louis, MO, USA                        | Rabbit      | Citrate pH 6               | 45                           | 1/1000          |
| TDP-43                | 2E2-D3           | Abnova, Taipei, Taiwan                                  | Mouse       | Citrate pH 6               | 45                           | 1/500           |
| pTDP-43               | 11-9             | Cosmo Bio, Tokyo, Japan                                 | Mouse       | EDTA pH 9                  | 45                           | 1/5000          |
